# Supplementary material
Source: PubMed Central journal article supplement (PMC3005134)

**Qing G supplementary Table**

**Summary of HIF- $\alpha$  staining in 15 primary neuroblastoma tumors.**

|                                 |          |          |          |          |          |          |          |          |          |         |          |          |          |          |          |
|---------------------------------|----------|----------|----------|----------|----------|----------|----------|----------|----------|---------|----------|----------|----------|----------|----------|
| <b>sample</b>                   | S00-4578 | S02-3700 | S08-6611 | S08-2426 | S03-2888 | S08-7220 | S92-4105 | S00-4481 | S01-3408 | S95-268 | S96-1558 | 892-4105 | 903-2568 | S95-3787 | 900-1545 |
| <b><i>MYCN</i> status</b>       | amp      | amp     | amp      | amp      | amp      | no       | no       |
| <b>HIF-1<math>\alpha</math></b> | +        | +        | +        | +        | +        | +        | +        | +        | +        | +       | +        | +        | +        | +        | +        |
| <b>HIF-2<math>\alpha</math></b> | -        | +        | +        | +        | -        | -        | -        | -        | -        | -       | -        | -        | -        | +        | +        |

("+": positive HIF- $\alpha$  staining; "-": negative HIF- $\alpha$  staining)

## Figure legends for supplemental figures

**Figure S1. Immunoblot analysis of HIF-1 $\alpha$  and HIF-2 $\alpha$  expression in neuroblastoma cells at 5% O<sub>2</sub>.** (A-F) Neuroblastoma cells were cultured at 21% and 5% O<sub>2</sub> for 48 hr, and respective HIF- $\alpha$  levels were detected using specific antibodies. Actin was used as a loading control.

**Figure S2. Immunoblot analysis of HIF-1 $\alpha$  and HIF-2 $\alpha$  expression in neuroblastoma cells at 1.5% O<sub>2</sub>.** (A-I) Neuroblastoma cells cultured at 21% and 1.5% O<sub>2</sub> were harvested at different time points, and respective HIF- $\alpha$  levels were detected using specific antibodies. Actin was used as a loading control.

**Figure S3. Relative levels of HIF-1 $\alpha$  and HIF-2 $\alpha$  mRNA in primary neuroblastoma samples with different tumor risks.** (A) Relative levels of HIF-1 $\alpha$ . (B) Relative levels of HIF-2 $\alpha$ . The levels of both HIF- $\alpha$  isoforms within each tumor risk group were normalized based on that of actin. Numbers of tumors used in the assay: low risk group (28), intermediate (21), *MYCN* single-copy, high risk (32) and *MYCN* amplified, high risk (20).

**Figure S4. Proliferation of *MYCN* amplified cell lines under normoxia and hypoxia.** (A-C) NPG, IMR32, and SMS-SAN cells were cultured at 21% and 1.5% O<sub>2</sub> and cell counting was performed at different time points shown in the figure. (D) LAN5 cells were cultured at 21% and 0.5% O<sub>2</sub> and cell counting was performed at different time points shown in the figure. Data are shown as an average of triplicates.

**Figure S5. Western analysis of HIF-1 $\alpha$  levels in control and knockdown cells.** HIF-1 $\alpha$  was inhibited by control or specific shRNAs in LAN5 cells, and the protein levels at either normoxia or hypoxia were determined by immunoblot assay.  $\beta$ -actin was used as a loading control.

**Figure S6. HIF-2 $\alpha$  expression in SK-N-BE2 cells and possible effects on glucose consumption, cell cycle progression and tumorigenesis.** (A) Detection of HIF-2 $\alpha$  by immunoblot assay. (B) Expression of HIF- $\alpha$  target genes;  $p < 0.01$ . (C) Glucose consumption as analyzed for 1 million cells. Data are shown as an average of triplicates. (D) Representative FACS plots from control and HIF-2 $\alpha$  transfected cells grown at 1.5% O<sub>2</sub> for 48 hr. (E) Tumorigenesis analyzed in a xenograft animal model. 5 million control or HIF-2 $\alpha$  transfected SK-N-BE2 cells were injected into nude mice, with each group consisting of 5 tumors.  $p = 0.886$ .

**Qing G supplementary Figure 1**

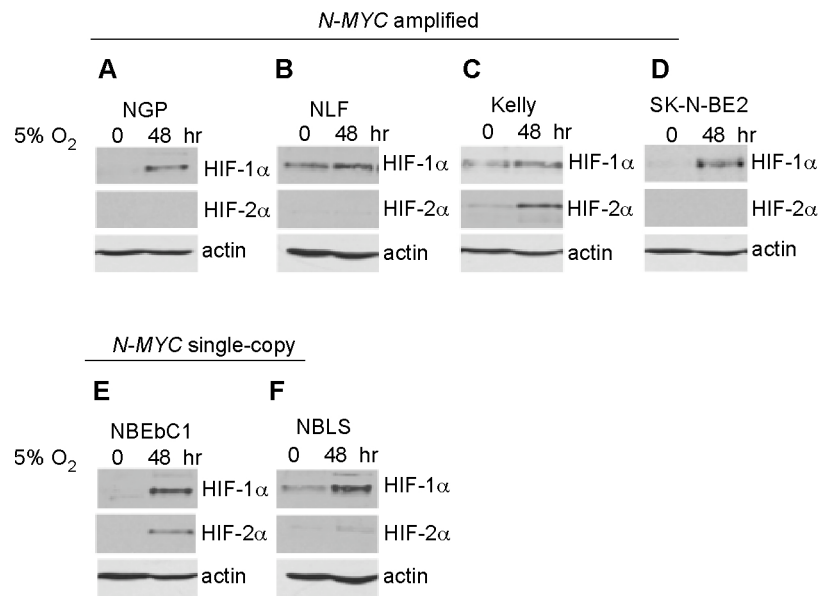

**Qing G supplementary Figure 2**

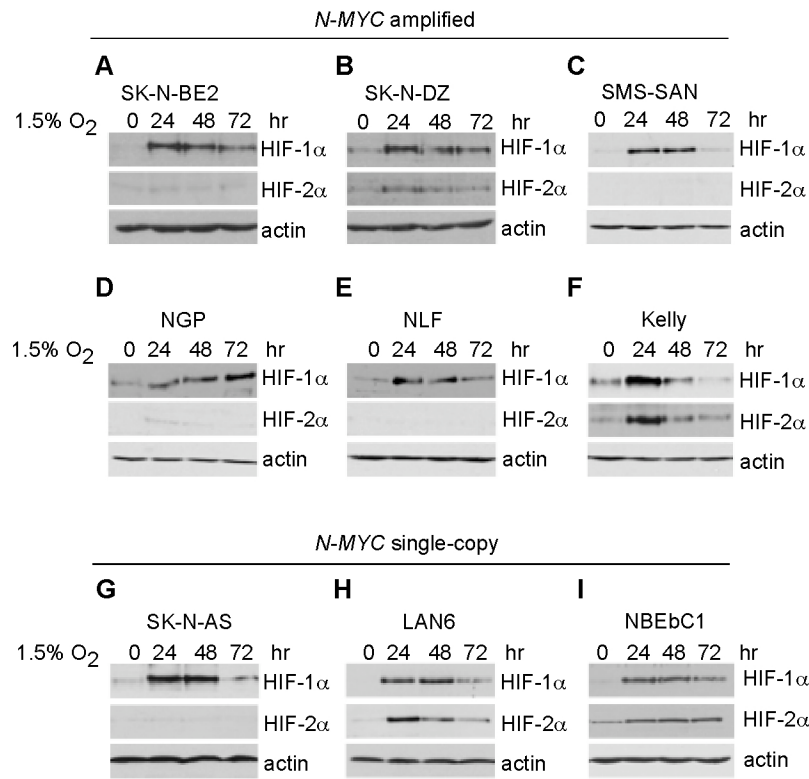

**Qing G supplementary Figure 3**

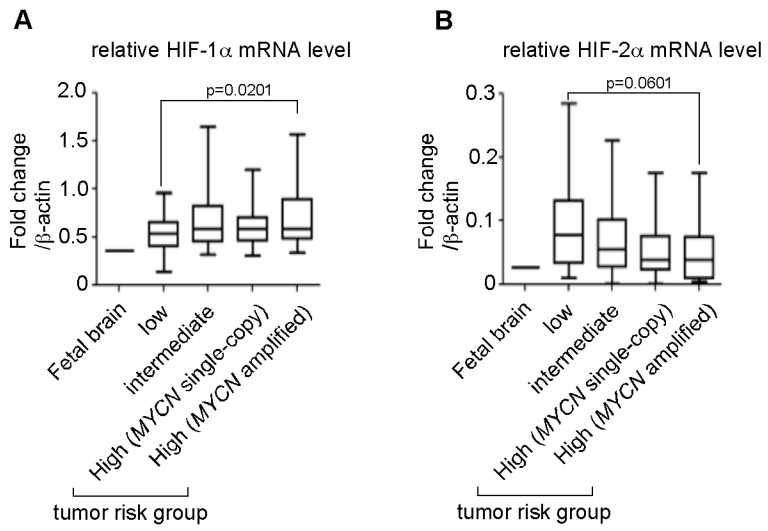

Qing G supplementary Figure 4

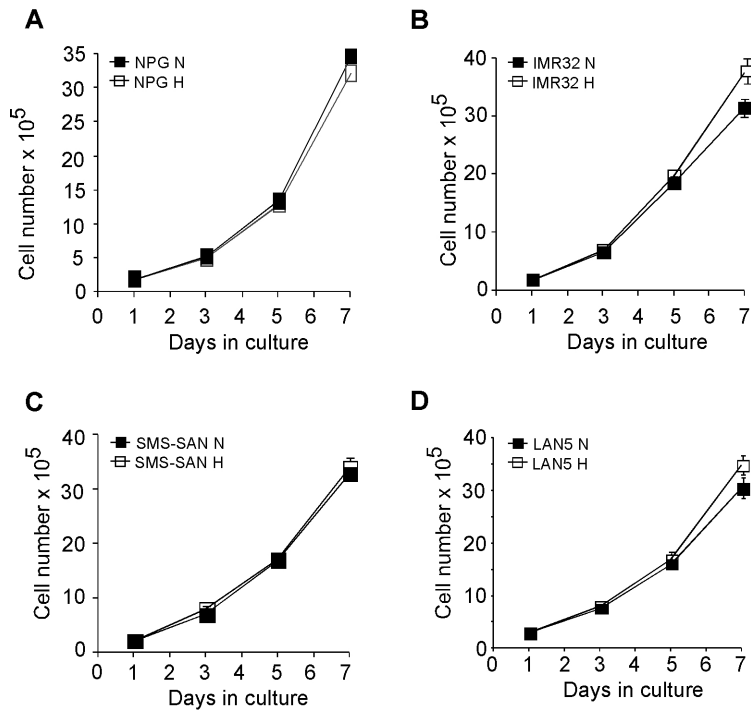

Qing G supplementary Figure 5

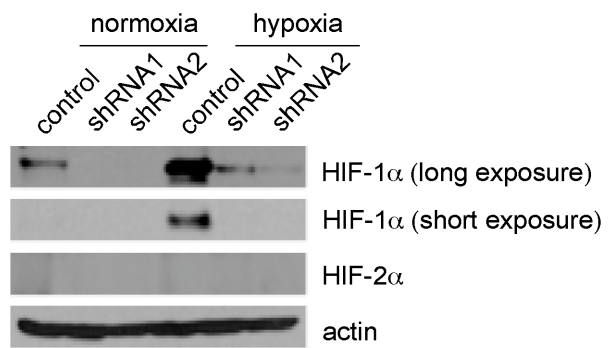

Qing G supplementary Figure 6

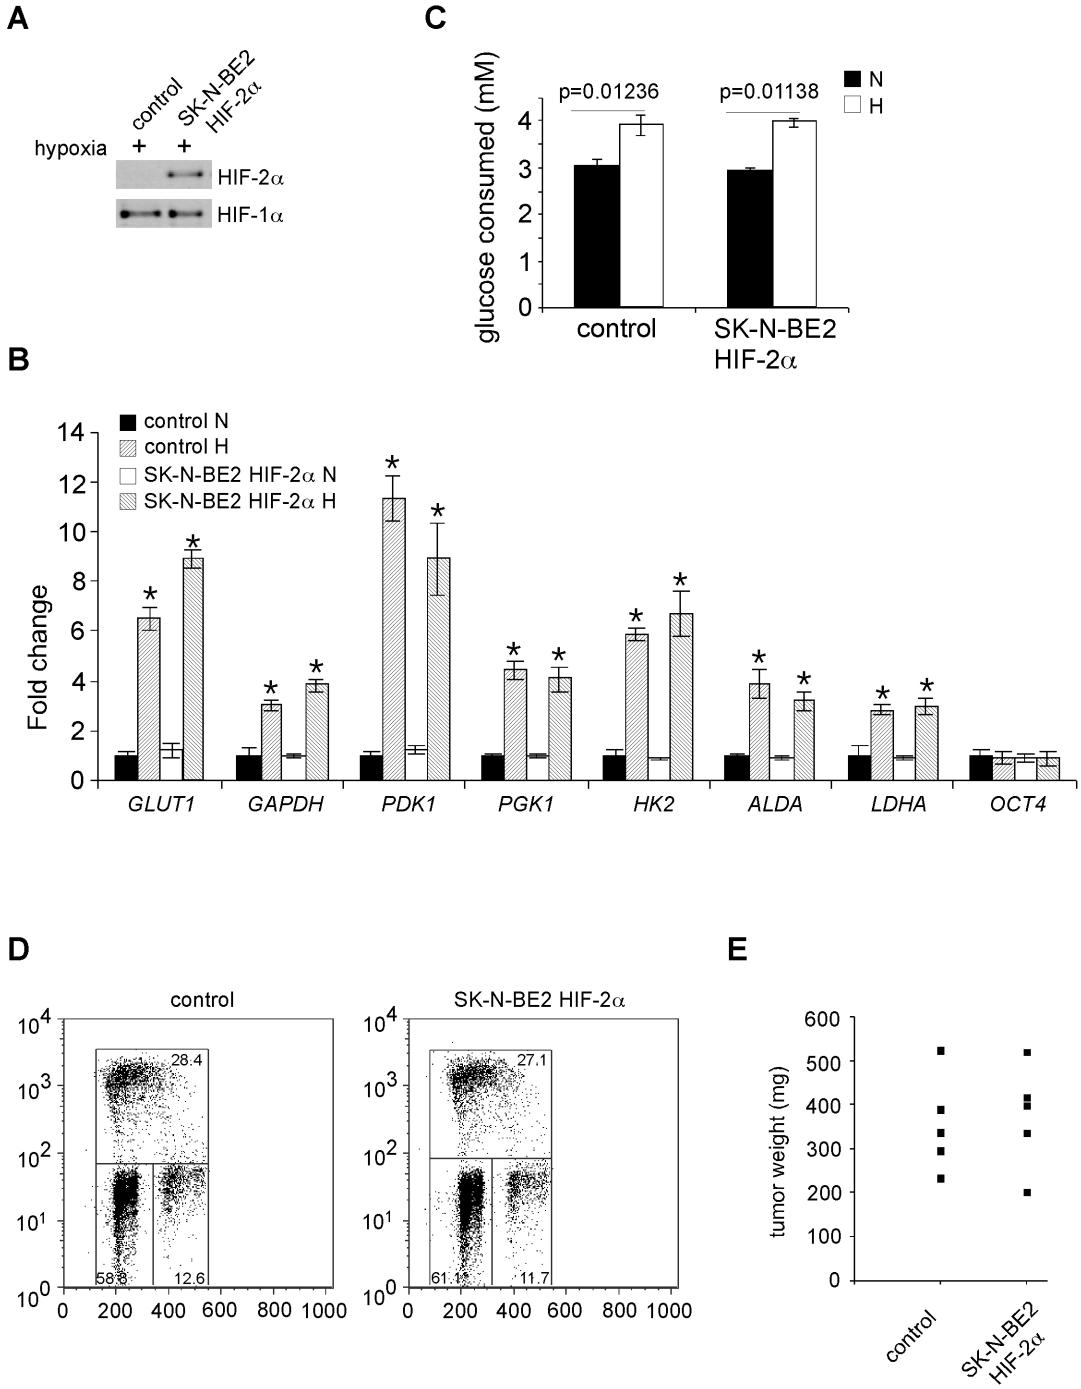

Supplement: NIHMS247039-supplement-1.pdf [file NIHMS247039-supplement-1.pdf]
